# Supplementary material for: Eye tracking and eye expression decoding based on transparent, flexible and ultra-persistent electrostatic interface
Source: PubMed Central journal article supplement (PMC10247702; doi:10.1038/s41467-023-39068-2), 2023-06-07
Supplement: 41467_2023_39068_MOESM3_ESM.pdf [file 41467_2023_39068_MOESM3_ESM.pdf]

## **Description of Additional Supplementary Files**

Supplementary Movie 1. Eye movement patterns.

Supplementary Movie 2. Closing eye tracking.

Supplementary Movie 3. Eye tracking system for visual preference analysis.

Supplementary Movie 4. Eyecontrolled input modality
